# Supplementary material for: Micropatterning with conical features can control bacterial adhesion on silicone
Source: Royal Society of Chemistry journal article supplement (doi:10.1039/c2sm26828k), 2012-12-17
Supplement: c2sm26828k.pdf [file c2sm26828k.pdf]

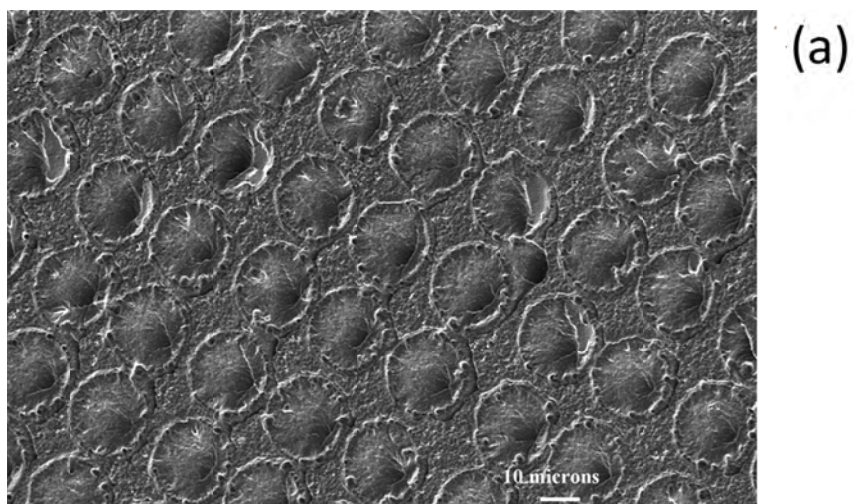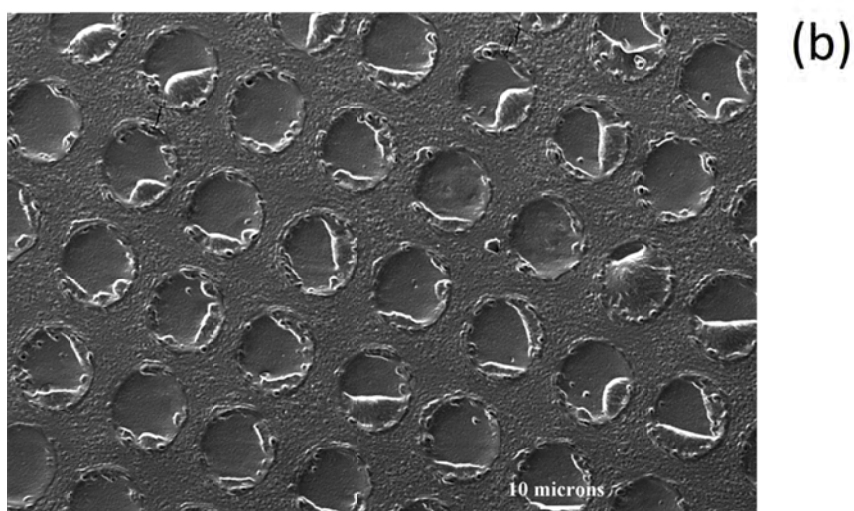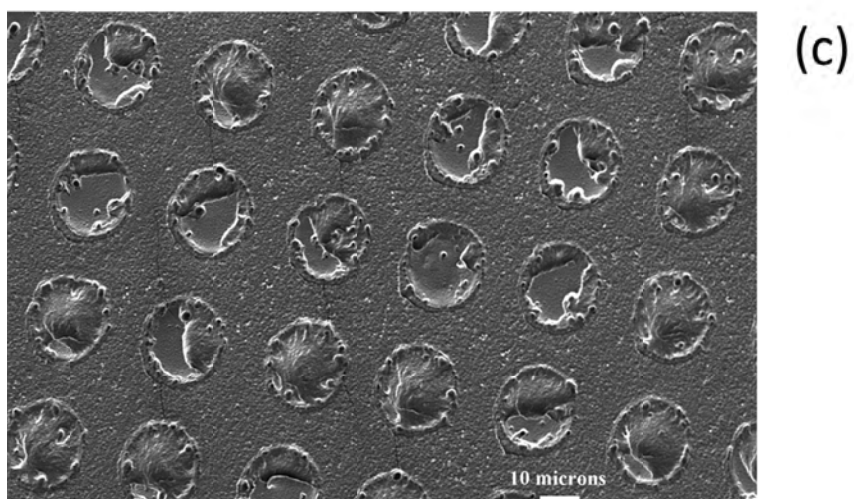

Figure 1 SEM images of silicone surfaces presenting conical features of 20  $\mu\text{m}$  with separation distance of 4  $\mu\text{m}$  (a), 8  $\mu\text{m}$  (b) and 13  $\mu\text{m}$  (c)

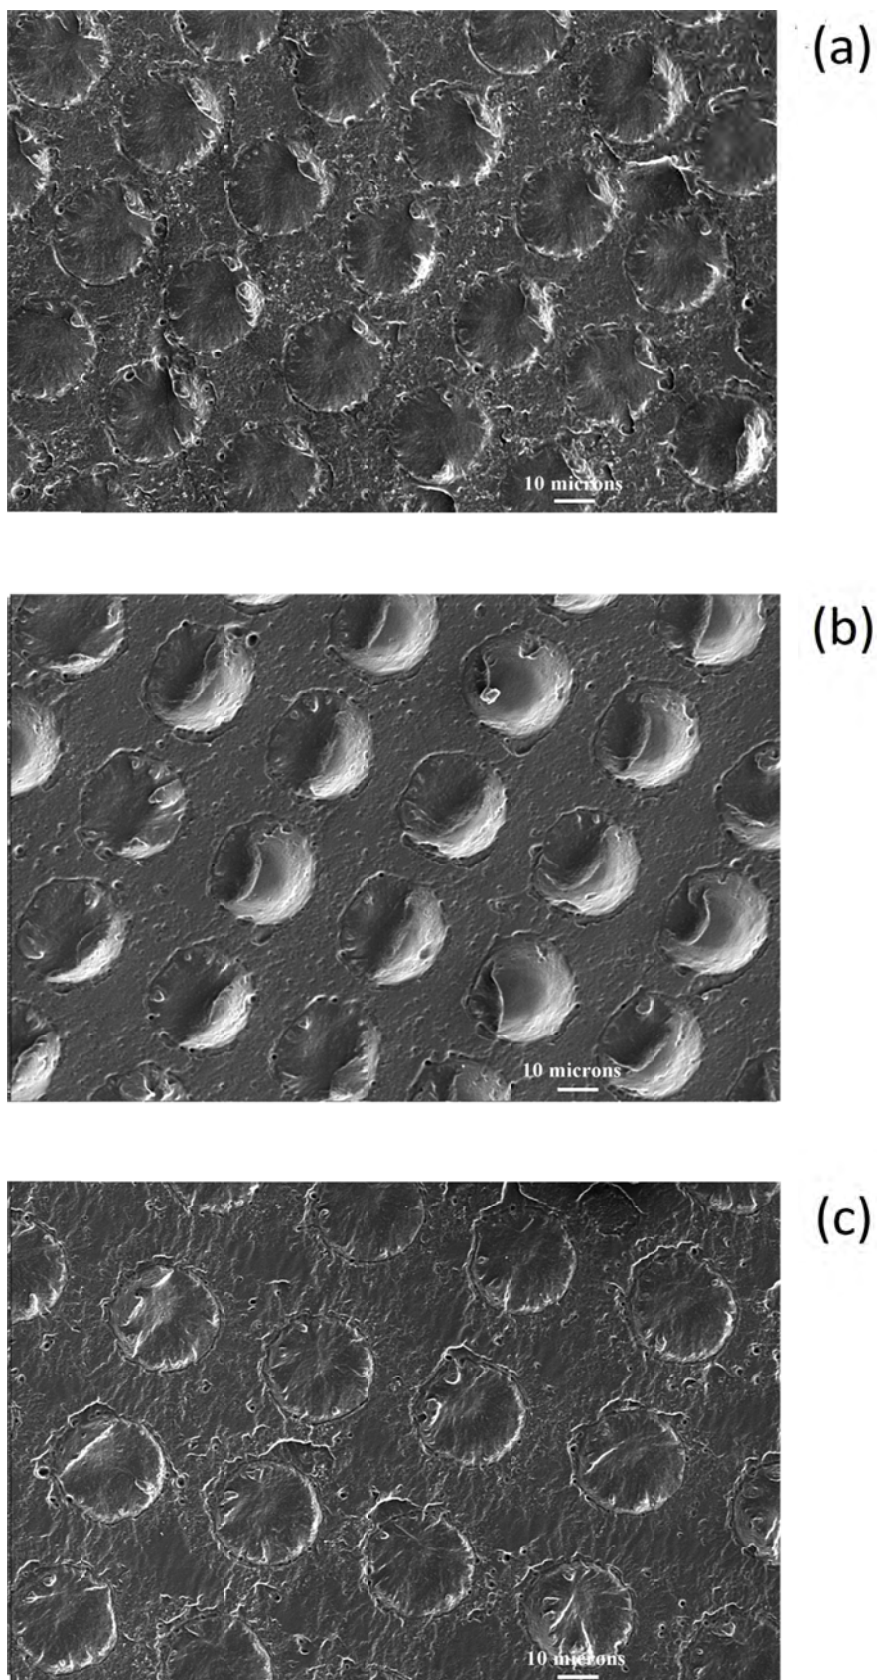

Figure 2 SEM images of silicone surfaces presenting conical features of 25  $\mu\text{m}$  with separation distance of 4  $\mu\text{m}$  (a), 8  $\mu\text{m}$  (b) and 13  $\mu\text{m}$  (c)

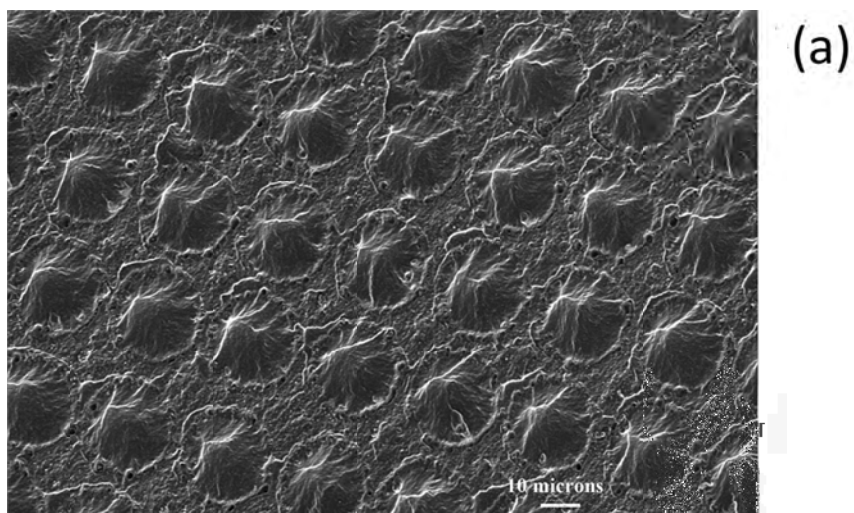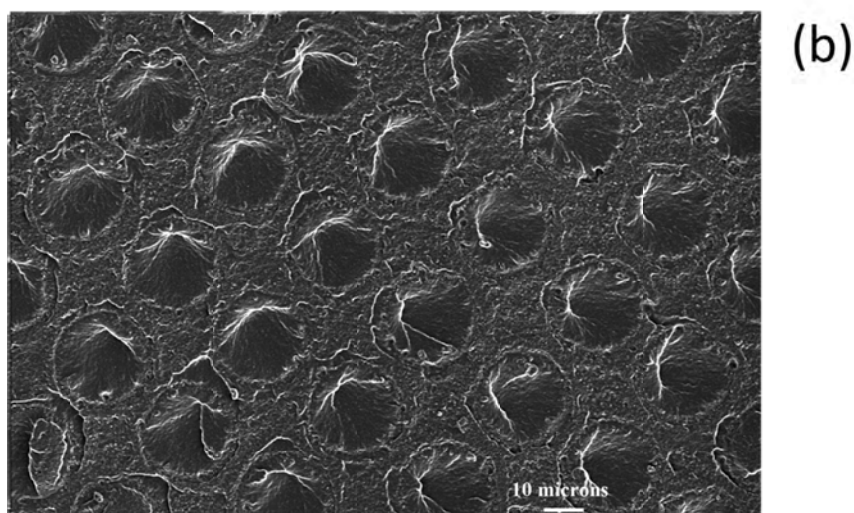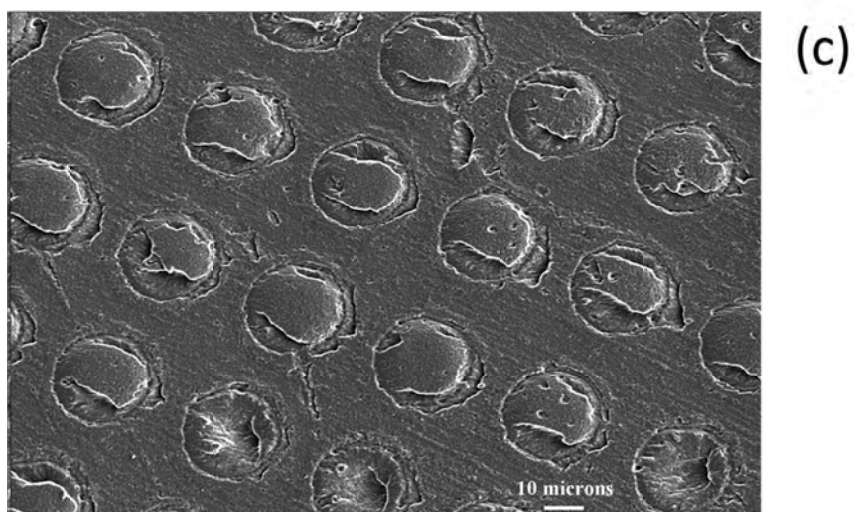

Figure 3 SEM images of silicone surfaces presenting conical features of  $30\ \mu\text{m}$  with separation distance of  $4\ \mu\text{m}$  (a),  $8\ \mu\text{m}$  (b) and  $13\ \mu\text{m}$  (c)

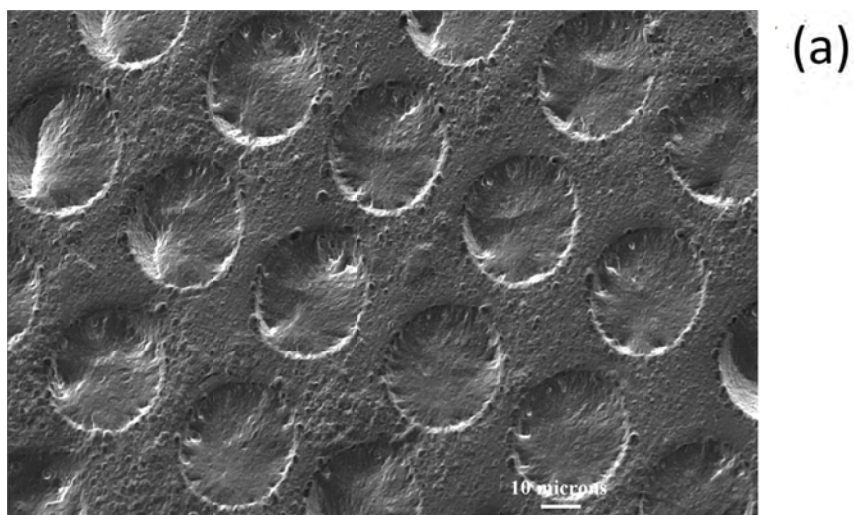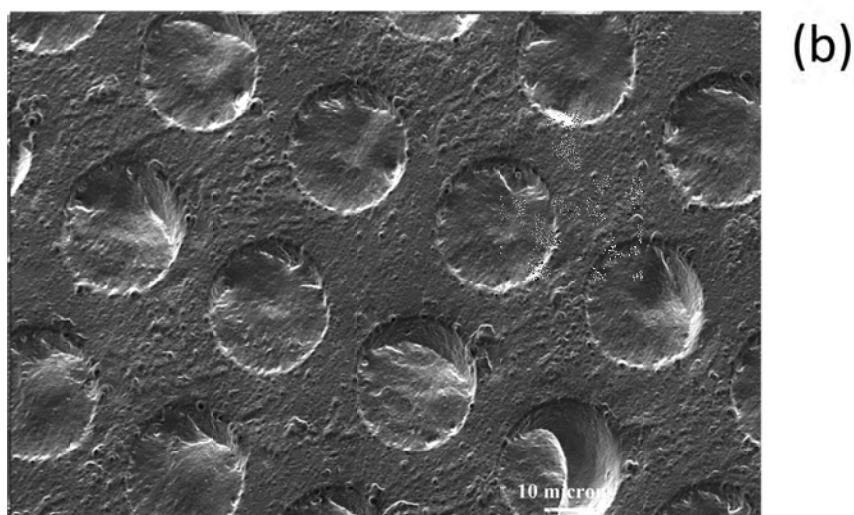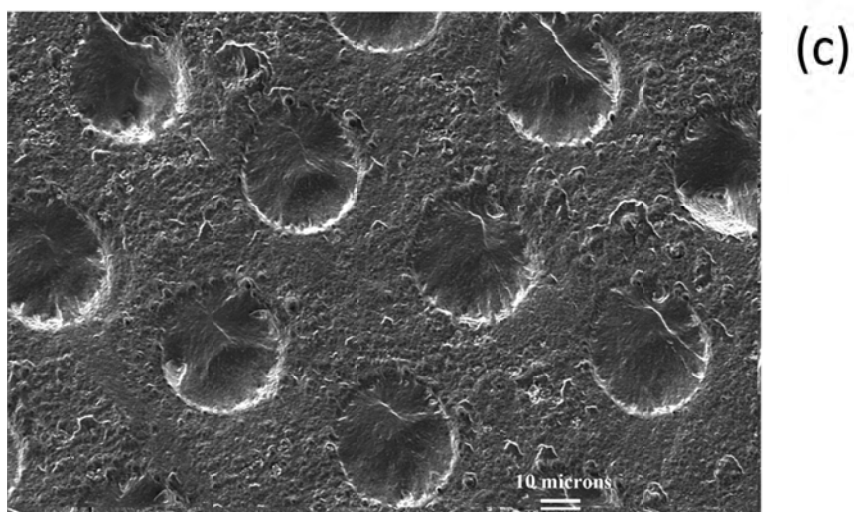

Figure 4 SEM images of silicone surfaces presenting conical features of 40 μm with separation distance of 4 μm (a), 8 μm (b) and 13 μm (c)
